# Supplementary material for: Evaluation of ATM heterozygous mutations underlying individual differences in radiosensitivity using genome editing in human cultured cells
Source: PubMed Central journal article supplement (PMC5519549; doi:10.1038/s41598-017-06393-8), 2017-07-20
Supplement: 41598_2017_6393_MOESM1_ESM.pdf [file 41598_2017_6393_MOESM1_ESM.pdf]

## Supplementary Information

Figures S1 to S7 and Tables S1 and S2

### **Evaluation of *ATM* heterozygous mutations underlying individual differences in radiosensitivity using genome editing in human cultured cells**

Ekaterina Royba<sup>1</sup>, Tatsuo Miyamoto<sup>1</sup>, Silvia Natsuko Akutsu<sup>1</sup>, Kosuke Hosoba<sup>1</sup>, Hiroshi Tauchi<sup>2</sup>, Yoshiki Kudo<sup>3</sup>, Satoshi Tashiro<sup>4</sup>, Takashi Yamamoto<sup>5</sup> and Shinya Matsuura<sup>1\*</sup>

<sup>1</sup>*Department of Genetics and Cell Biology, Research Institute for Radiation Biology and Medicine, Hiroshima University, Hiroshima 734-8553, Japan*

<sup>2</sup>*Department of Biological Sciences, Faculty of Science, Ibaraki University, Mito 310-8512, Japan*

<sup>3</sup>*Department of Obstetrics and Gynecology, Graduate School of Biomedical Sciences, Hiroshima University, Hiroshima 734-8551, Japan*

<sup>4</sup>*Department of Cellular Biology, Research Institute for Radiation Biology and Medicine, Hiroshima University, Hiroshima 734-8553, Japan*

<sup>5</sup>*Department of Mathematical and Life Sciences, Graduate School of Science, Hiroshima University, Higashi-Hiroshima 739-8526, Japan*

**\*Correspondence: e-mail: [shinya@hiroshima-u.ac.jp](mailto:shinya@hiroshima-u.ac.jp)**

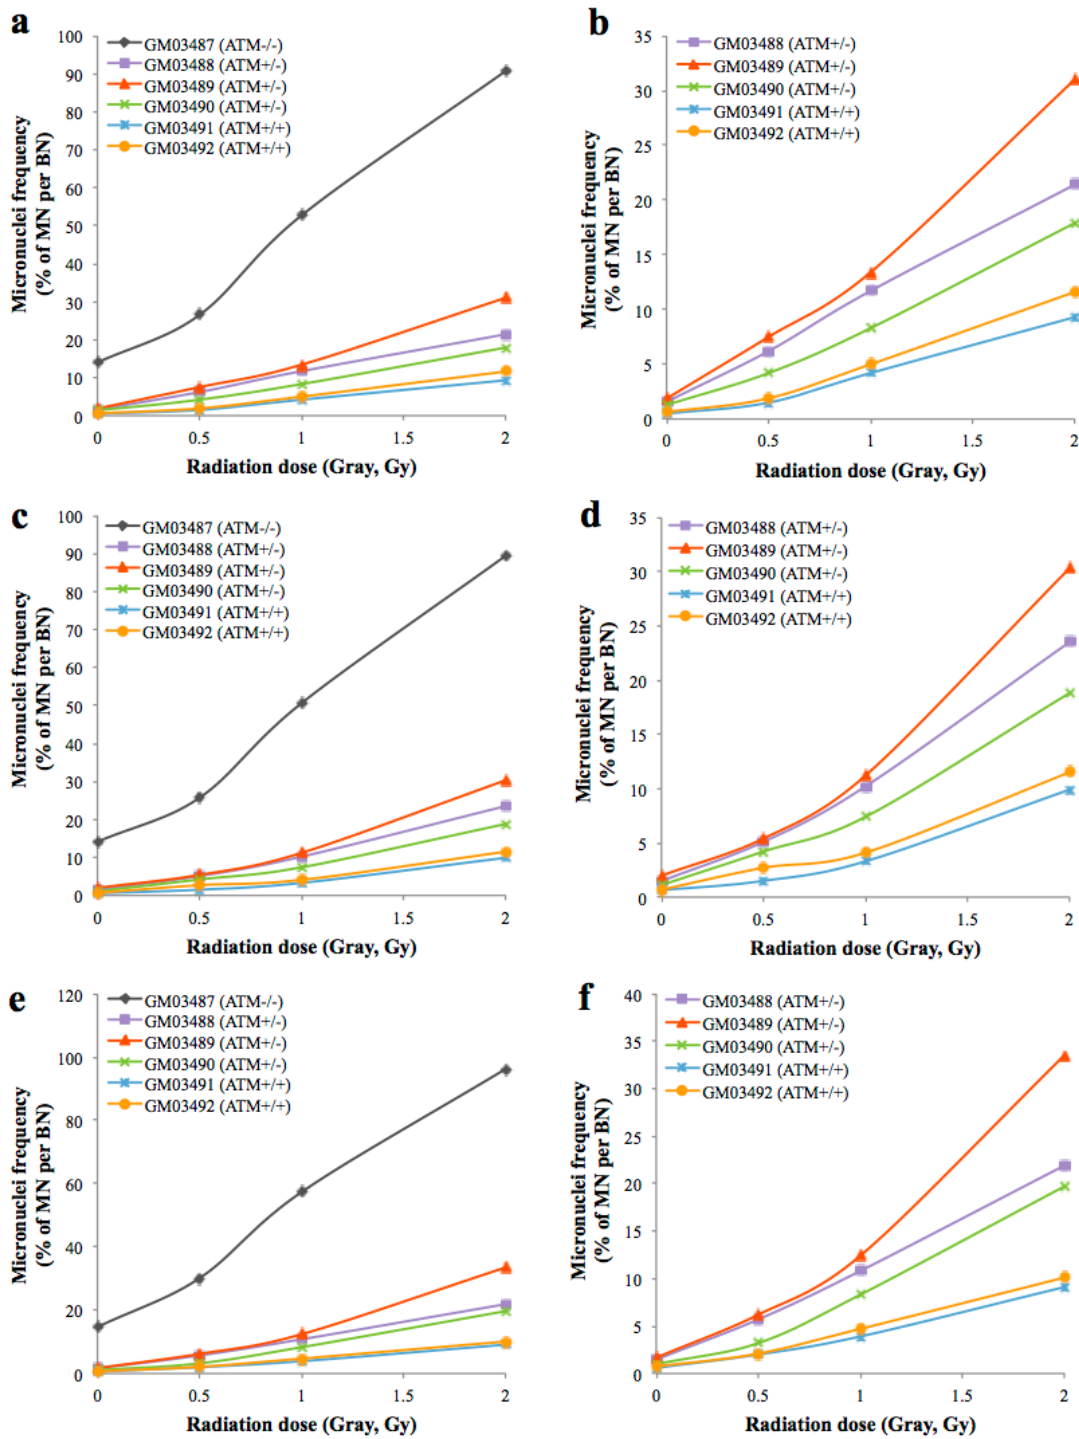

**Figure S1. Three independent CBMN assays in primary fibroblasts from an A-T-affected family. (a), (c) and (e)** Three graphs showing the results of three independent CBMN assays. Percentage of IR-induced MN formation in fibroblasts from all members of the A-T-affected family (>1000 BN cells, >50 BN cells only in A-T patient fibroblasts). **(b) (d) and (f)** The graphs from (a), (c) and (e), respectively, with magnification of the Y-axis including the percentage of IR-induced MN formation in fibroblasts derived from A-T heterozygous carriers and unaffected individuals.

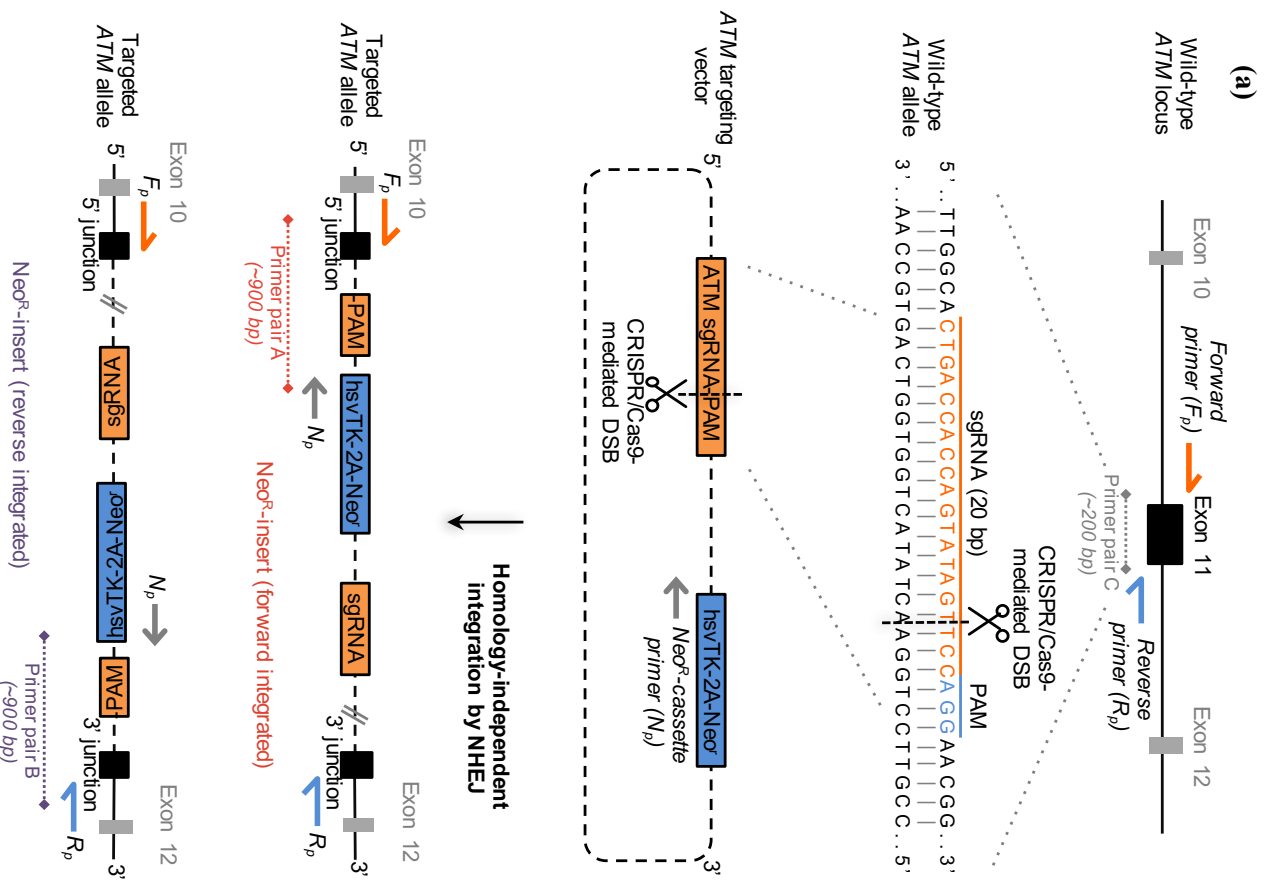

**(a)**

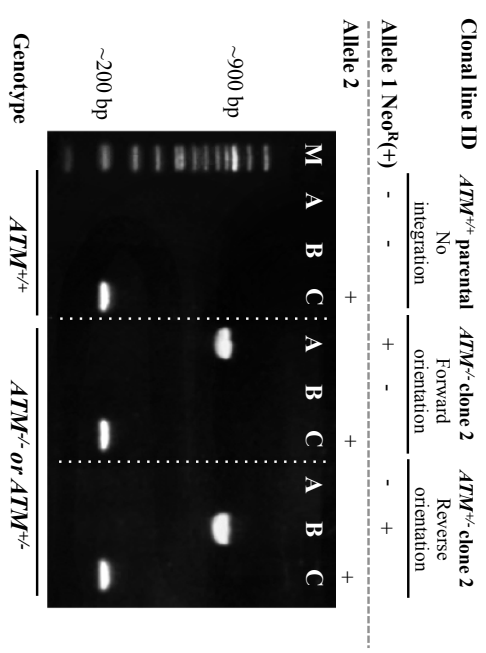

**(b)**

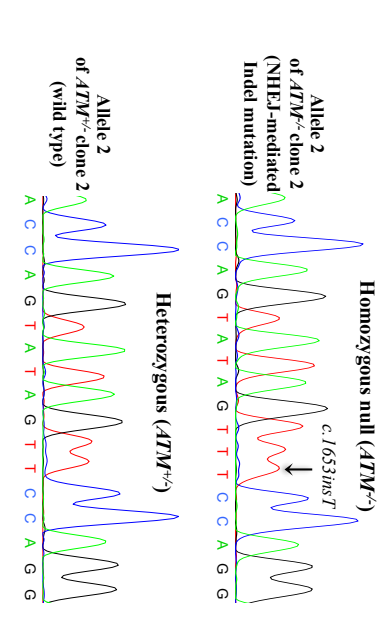

**(c)**

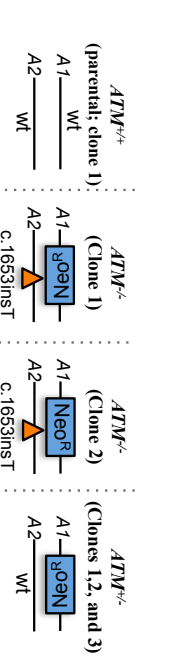

**Figure S2. CRISPR-ObLiGaRe method generated ATM-edited hTERT-RPE1 cell lines with a uniform genetic background.**

**(a)** The CRISPR/ObLiGaRe-mediated genome-editing strategy. *ATM* gene exon 11 and the targeting vector containing an *hsvTK-2A-Neo<sup>r</sup>* selection cassette were cleaved in hTERT-RPE1 cells using a set of Cas9-nuclease and the sgRNA targeting for *ATM* gene exon 11. The linearized targeting vector was integrated into *ATM* gene exon 11 in an NHEJ-dependent manner. The orientation of the targeting vector upon insertion could not be controlled. For genotyping of the targeted site in positive drug-selected clones, PCR genotyping and direct sequencing were combined. **(b)** PCR genotyping step: the integration of a drug-resistant cassette was evaluated by PCR using the primer pairs A and B as shown in (a). *ATM* exon 11 without a gene cassette was amplified by PCR using primer pair C denoted in (a). An agarose-electrophoresis image showed the presence or absence of the insertion of a targeting vector into *ATM* gene exon 11 in the parental RPE1 cell, *ATM*<sup>-/-</sup> clone 2 and *ATM*<sup>+/-</sup> clone 2. **(c)** Direct sequencing step: Insertions/deletions in an allele without a drug-resistant cassette were directly checked by Sanger sequencing. *ATM*<sup>-/-</sup> clone 2 contained a 1-bp insertion (c.1653 insT, p.V551X) at a CRISPR/Cas9-mediated DSB site. **(d)** Schematic representation of the final genotype in *ATM*-edited hTERT-RPE1 cell clones generated by the CRISPR/ObLiGaRe method. For details, see Table 1.

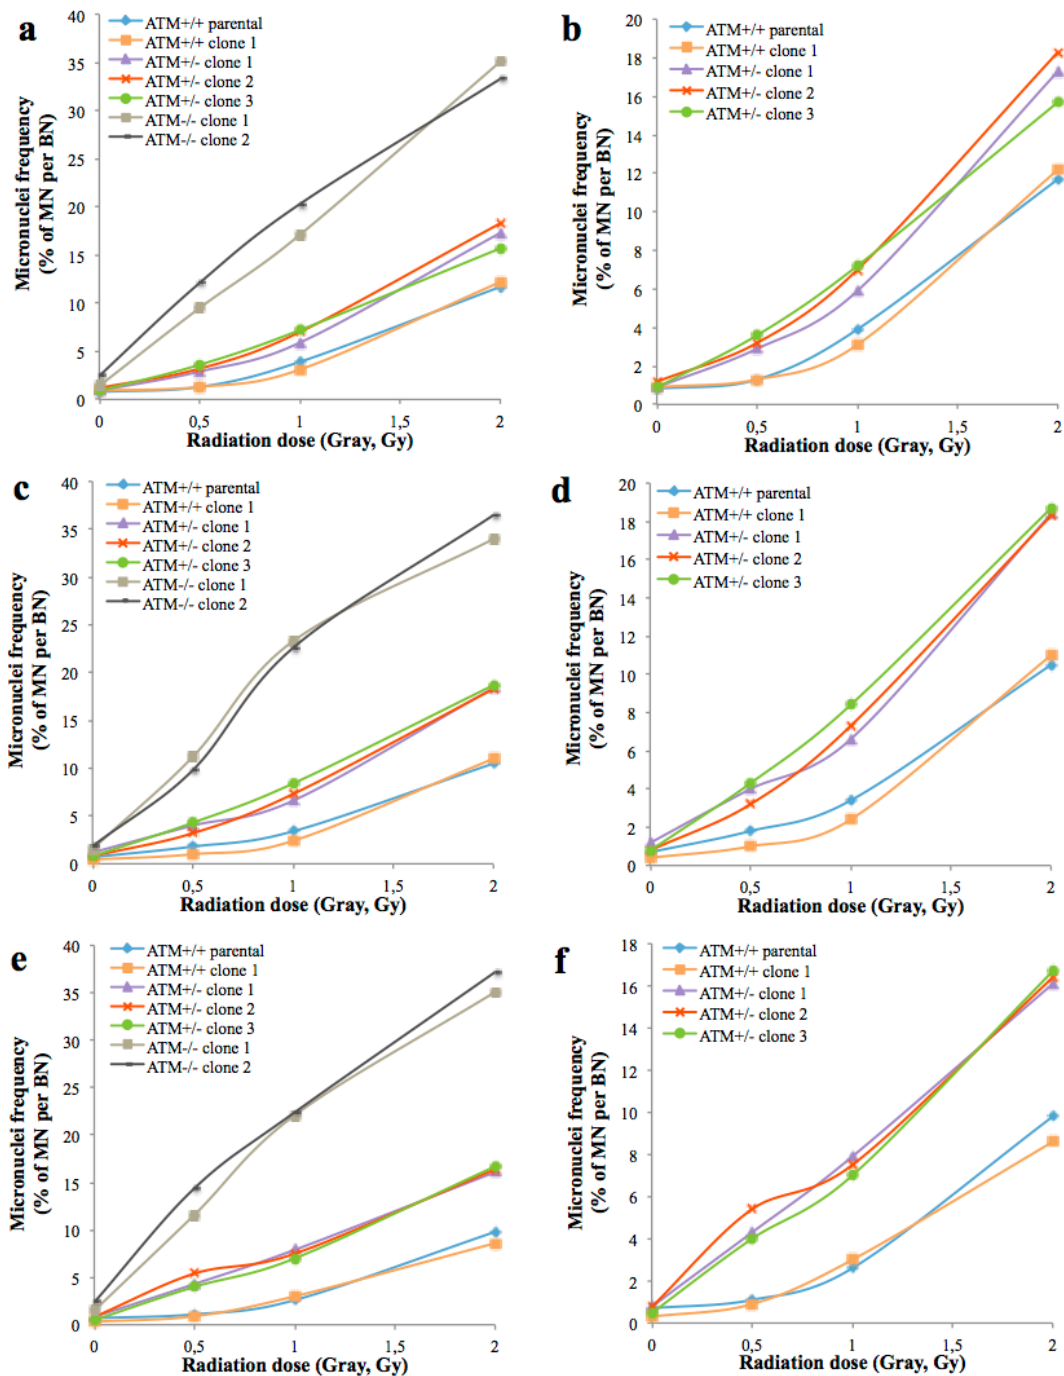

**Figure S3. Three independent CBMN assays in *ATM*-edited hTERT-RPE1 cell clones.**

(a), (c) and (e) Three graphs showing the results of three independent CBMN assays. Percentage of IR-induced MN formation in *ATM*-edited cell clones (>1000 BN cells, >50 BN cells only in *ATM*<sup>-/-</sup> cell clones). (b), (d) and (f) The graphs from (a), (c) and (e), respectively, with magnification of the Y-axis including the percentage of IR-induced MN formation in *ATM*<sup>+/-</sup> and *ATM*<sup>+/+</sup> cell clones.

**Chromosomal aberrations produced after irradiation in G1/ early S phase**

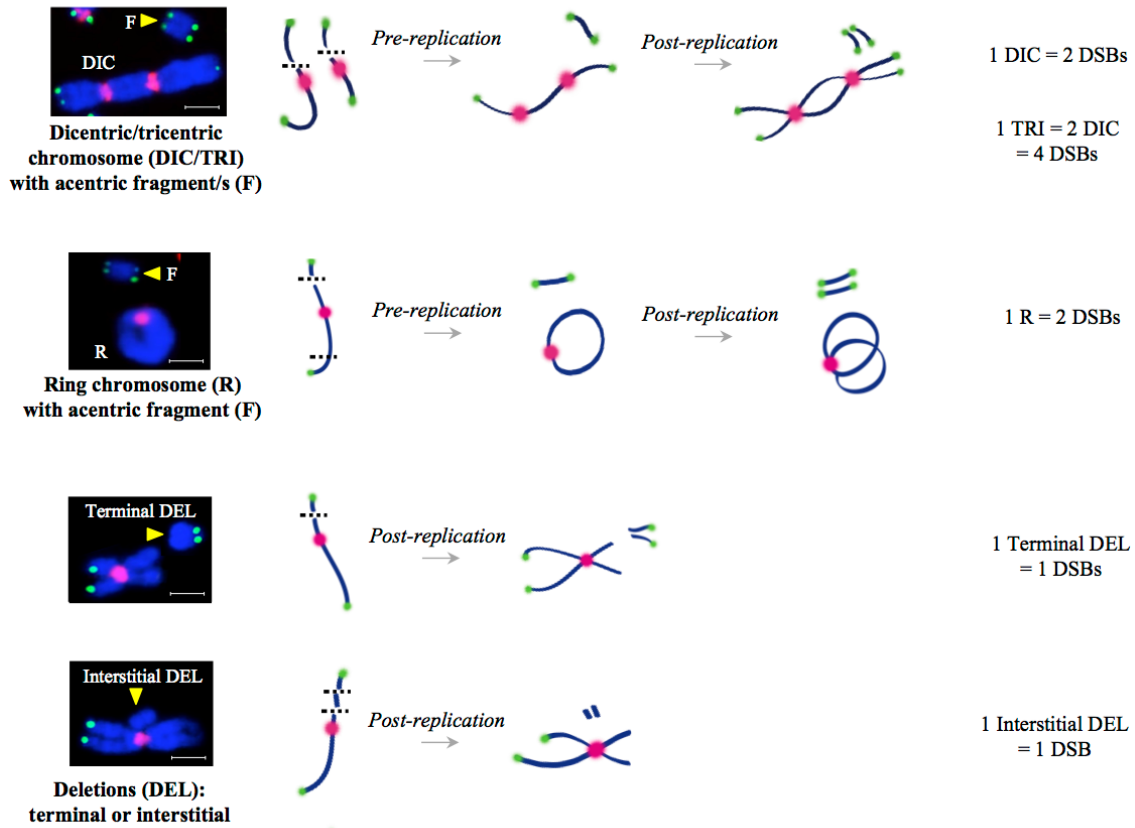

**Chromatid aberrations produced after irradiation in Mid to Late S and G2 phase**

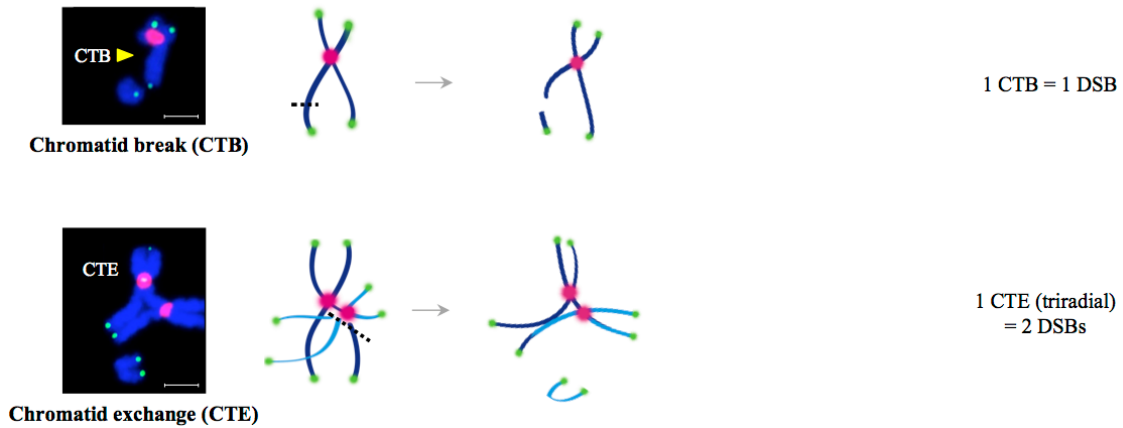

**Figure S4. Evaluation of unrepaired DNA DSBs from chromosomal aberrations detected by PNA-FISH analysis.**

Since the pattern of chromosomal aberrations is dependent on the number of unrepaired DSBs, we considered the process of formation of each such aberration to quantify unrepaired DSBs. Scale bars: 2  $\mu$ m.

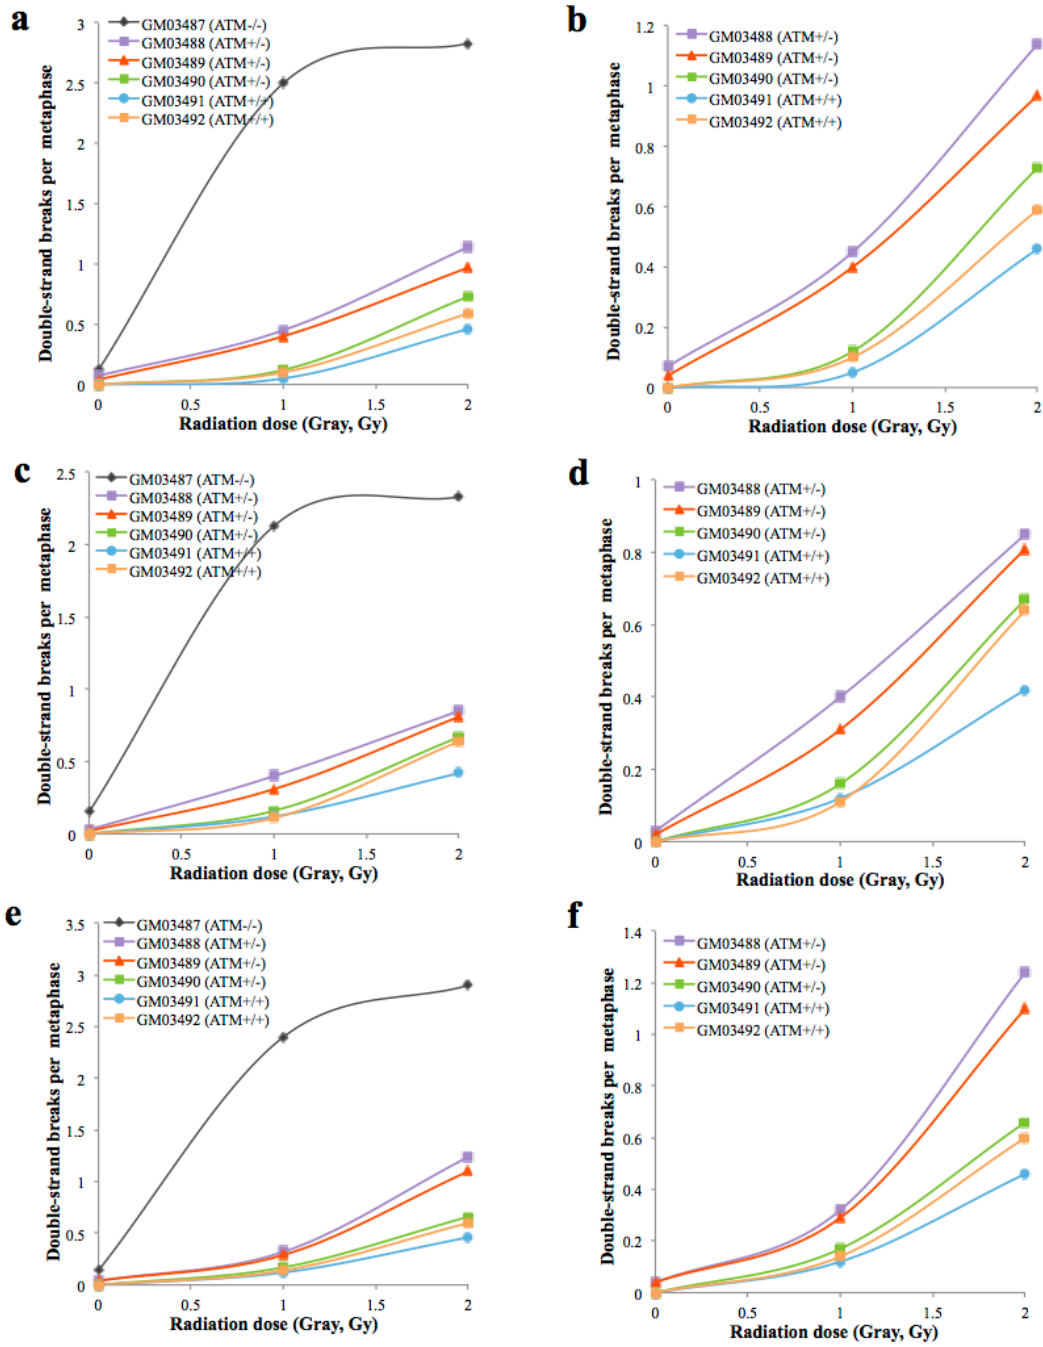

**Figure S5. Centromere/telomere PNA-FISH analysis in the primary fibroblasts from the A-T-affected family. (a), (c) and (e) Raw data for three independent trials in the primary fibroblasts. (b), (d) and (f) from (a), (c) and (e), respectively, with magnification of the Y-axis for three independent trials in the fibroblasts from A-T heterozygous carrier and normal individuals.**

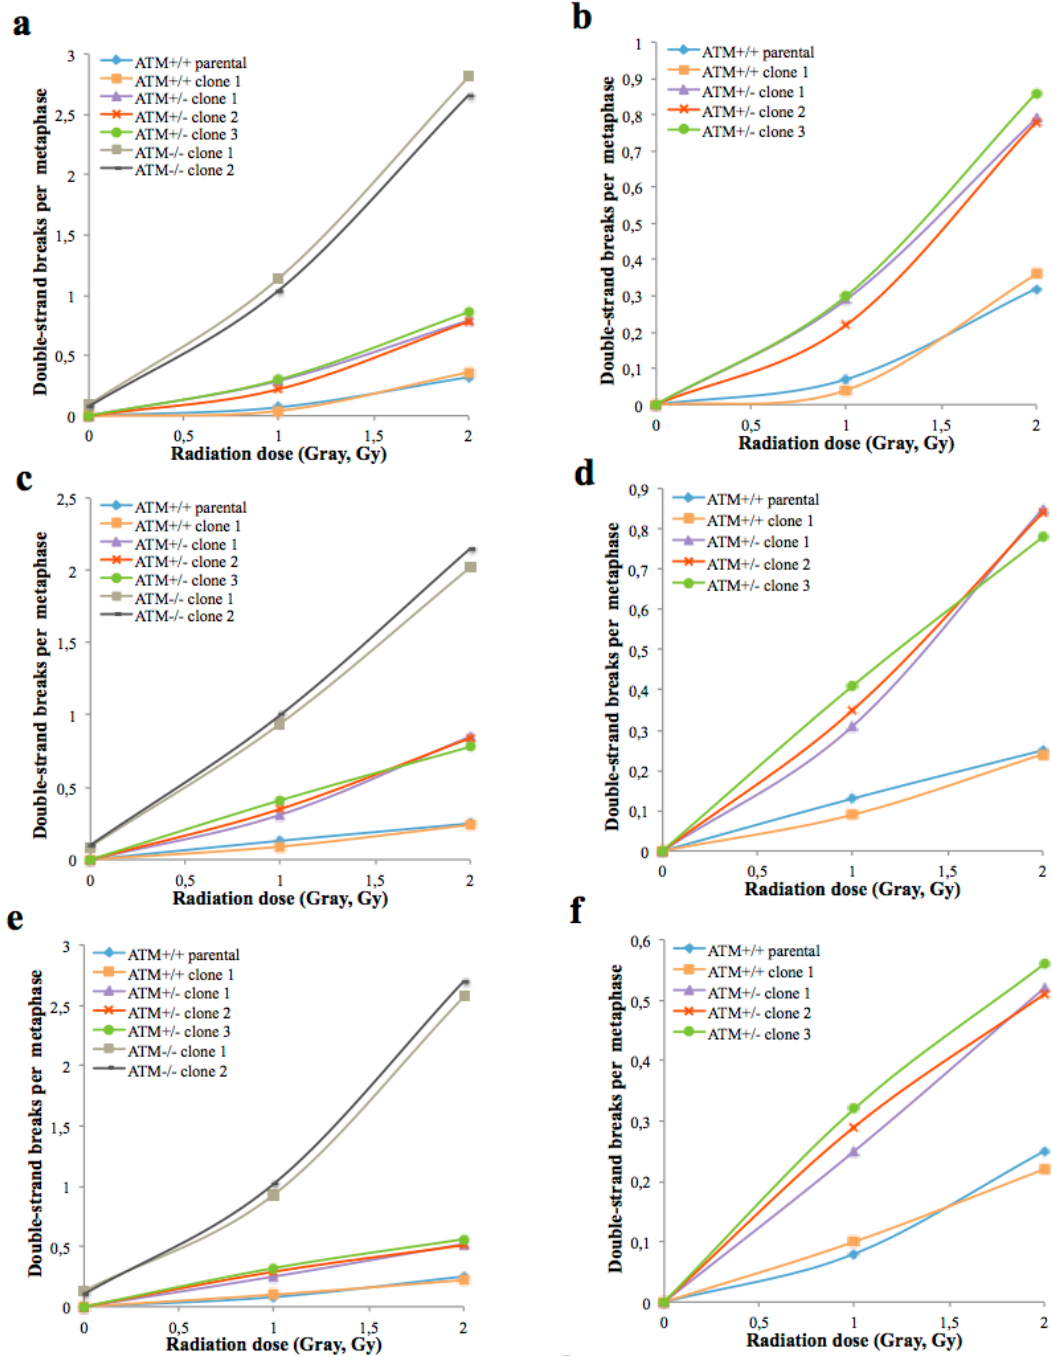

**Figure S6. Centromere/telomere PNA-FISH data in *ATM*-edited hTERT-RPE1 cell lines. (a), (c) and (e) Raw data for three independent trials in *ATM*-edited hTERT-RPE1 cell lines. (b), (d) and (f) Raw data from (a), (c) and (e), respectively, with magnification of the Y-axis for three independent trials in *ATM*<sup>+/-</sup> and *ATM*<sup>+/+</sup> cell clones.**



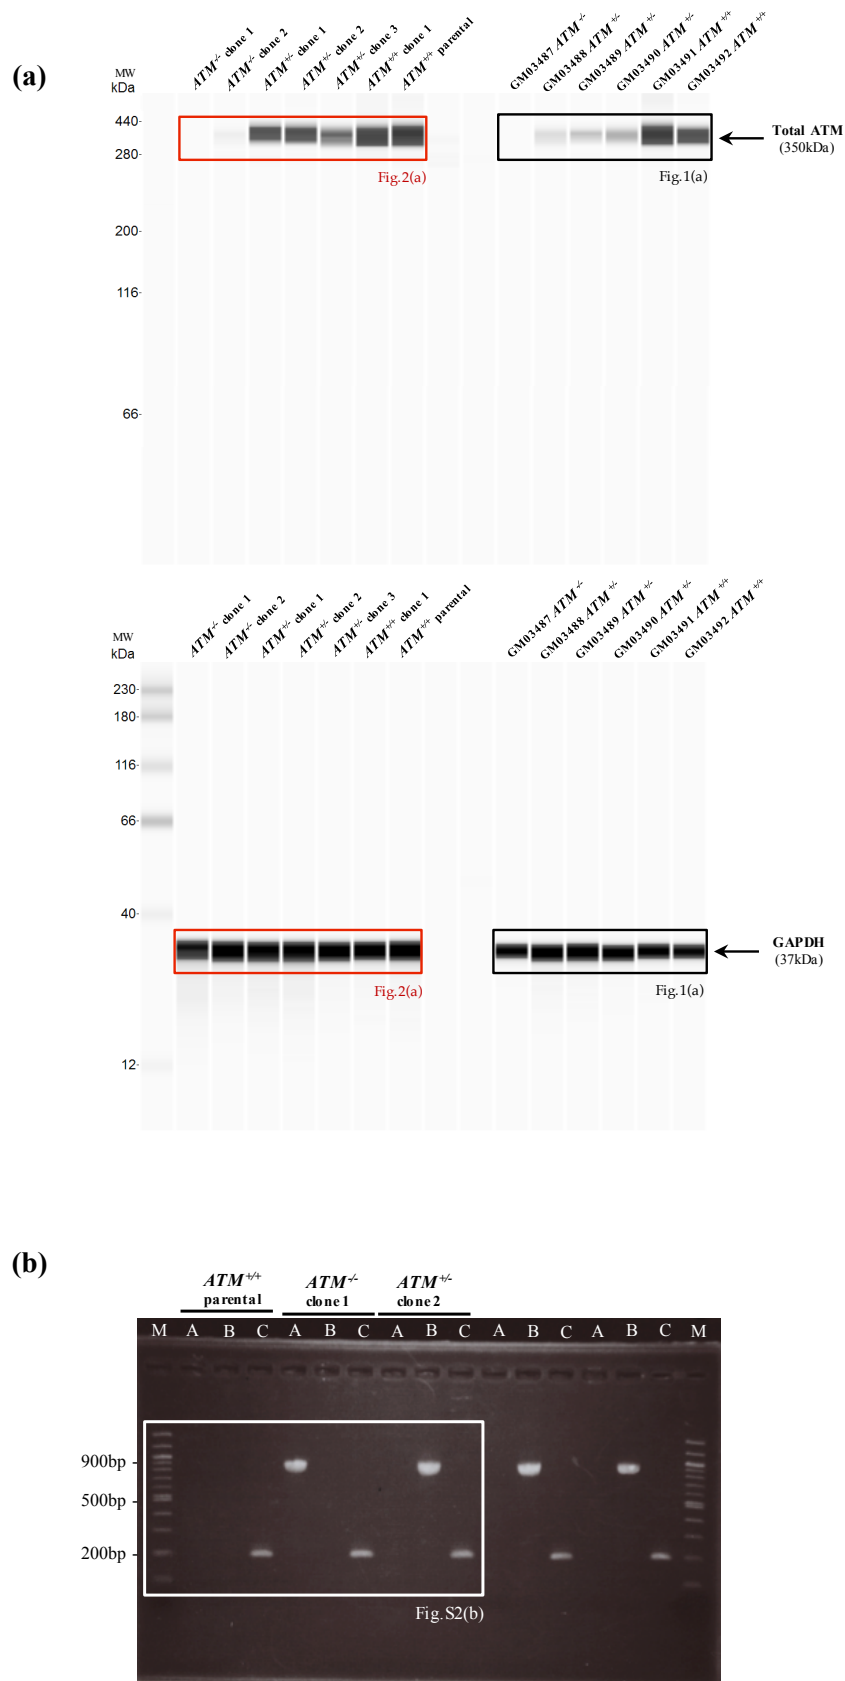

**Figure S7. Full-scan of western blots and agarose gel electrophoresis. (a)** Raw data of Fig. 1a and Fig. 2a captured using an automated capillary-based western blotting system. **(b)** Raw image of agarose gel electrophoresis in Fig. S2b.

| Fibroblast cell line ID (Coriell Institute) | Donor                   | <i>ATM</i> gene mutation<br>(Transcript # ATM-201, ENST00000278616.8) |                         |                     | Genotype                  |
|---------------------------------------------|-------------------------|-----------------------------------------------------------------------|-------------------------|---------------------|---------------------------|
|                                             |                         | <i>ATM</i> exon #                                                     | DNA sequence change     | Amino acid change   |                           |
| GM03487                                     | Male, 8 y.o., proband   | Exon 9<br>Exon 56                                                     | c.1141ins4<br>c.8266A>T | [S381X]<br>[K2756X] | <i>ATM</i> <sup>-/-</sup> |
| GM03488                                     | Male, 41 y.o., father   | Exon 9                                                                | c.1141ins4              | [S381X]             | <i>ATM</i> <sup>+/-</sup> |
| GM03489                                     | Female, 37 y.o., mother | Exon 56                                                               | c.8266A>T               | [K2756X]            | <i>ATM</i> <sup>+/-</sup> |
| GM03490                                     | Female, 16 y.o., sister | Exon 9                                                                | c.1141ins4              | [S381X]             | <i>ATM</i> <sup>+/-</sup> |
| GM03491                                     | Female, 15 y.o., sister | -                                                                     | Wild type               | Wild type           | <i>ATM</i> <sup>+/+</sup> |
| GM03492                                     | Male, 7 y.o., brother   | -                                                                     | Wild type               | Wild type           | <i>ATM</i> <sup>+/+</sup> |

**Table S1. Genetic information about *ATM* gene in six members of the A-T-affected family examined in this study.**

| Cell line ID                      | ATM exon # | Allele 1<br>( <i>Obligare</i> -mediated<br><i>Neo<sup>R</sup></i> cassette integration) | Allele 2 ( <i>CRISPR/Cas9</i> -mediated indel mutations)<br>(Transcript # ATM-201, ENST00000278616.8) |                   | Genotype                 |
|-----------------------------------|------------|-----------------------------------------------------------------------------------------|-------------------------------------------------------------------------------------------------------|-------------------|--------------------------|
|                                   |            |                                                                                         | DNA sequence change                                                                                   | Amino acid change |                          |
| <i>ATM<sup>-/-</sup></i> clone 1  | Exon 11    | Neo+ (reverse orientation)                                                              | c.1653insT                                                                                            | [V551X]           | <i>ATM<sup>-/-</sup></i> |
| <i>ATM<sup>-/-</sup></i> clone 2  | Exon 11    | Neo+ (forward orientation)                                                              | c.1653insT                                                                                            | [V551X]           | <i>ATM<sup>-/-</sup></i> |
| <i>ATM<sup>+/-</sup></i> clone 1  | Exon 11    | Neo+ (reverse orientation)                                                              | Wild type                                                                                             | Wild type         | <i>ATM<sup>+/-</sup></i> |
| <i>ATM<sup>+/-</sup></i> clone 2  | Exon 11    | Neo+ (reverse orientation)                                                              | Wild type                                                                                             | Wild type         | <i>ATM<sup>+/-</sup></i> |
| <i>ATM<sup>+/-</sup></i> clone 3  | Exon 11    | Neo+ (reverse orientation)                                                              | Wild type                                                                                             | Wild type         | <i>ATM<sup>+/-</sup></i> |
| <i>ATM<sup>+/+</sup></i> clone 1  | -          | Neo- (wild type) plus<br>Neo+ (random integration)                                      | Wild type                                                                                             | Wild type         | <i>ATM<sup>+/+</sup></i> |
| <i>ATM<sup>+/+</sup></i> parental | -          | Neo- (wild type)                                                                        | Wild type                                                                                             | Wild type         | <i>ATM<sup>+/+</sup></i> |

**Table S2. Genetic information of *ATM*-edited hTERT-RPE1 cell clones.**
